# Supplementary material
Source: publisher site journal article supplement (https://www.dovepress.com/get_supplementary_file.php?f=216745-S1.xlsx)
Supplement: Supplementary file 1 [file get_supplementary_file.php]

## Sheet: BAC_SNP_pileup.total.cds
Table.S1 Quality control statistics of the WGS for the 10 A. baumannii isolates
	MDR-CQA	MDR-CQB	MDR-CQC	MDR-CQD	MDR-CQE	MDR-CQF	MDR-CQG	MDR-CQH	MDR-CQI	MDR-CQJ
Insert_size(bp)	287	300	298	287	296	280	296	282	290	287
Reads_length(bp)	150	150	150	150	150	150	150	150	150	150
Reads(M)	10.18	11.44	7.71	7.54	9.47	7.49	8.46	7.6	9.42	8.16
Bases(G)	1.53	1.72	1.16	1.13	1.42	1.12	1.27	1.14	1.41	1.22
Q20_rate(%)	97.47	98.55	97.74	97.75	97	97.74	97.39	97.76	97.34	98.47
Q30_rate(%)	94.97	96.93	96.3	96.33	95.1	96.29	95.67	96.31	95.6	97.46
GC_rate(%)	39.05	39.1	39.25	39.21	39.43	39.38	39.33	39.39	39.42	39.37
Average_depth	369.75	428.99	292.23	280.06	342.06	277.16	318.08	273.95	338.09	308.41
Coverage>=1X	97.24	99.33	100	99.33	98.4	96.25	99.99	98.33	98.39	100
Coverage>=4X	97.23	99.33	100	99.33	98.38	96.2	99.99	98.3	98.38	100
Coverage>=10X	97.21	99.32	100	99.32	98.37	96.17	99.98	98.28	98.37	100
Coverage>=20X	97.19	99.32	100	99.32	98.36	96.16	99.96	98.25	98.37	100
Map_rate	92.93	98.58	99.27	97.8	93.46	93.54	98.48	92.97	93.47	99.01
